# Supplementary material for: Post-viral parenchymal lung disease following COVID-19 and viral pneumonitis hospitalisation: A systematic review and meta-analysis
Source: bioRxiv or medRxiv preprint supplement (doi:10.1101/2021.03.15.21253593), 2021-09-17

Online supplementary material for

**Title: Post-viral parenchymal lung disease of COVID-19 and viral pneumonitis: A systematic review and meta-analysis.**

## Table of Contents

|                                                                                                                |    |
|----------------------------------------------------------------------------------------------------------------|----|
| Supplementary Table 1. Risk of bias assessment, observational studies .....                                    | 3  |
| Supplementary Table 2. Risk of bias assessment, randomized control trial .....                                 | 5  |
| Supplementary Table 3. GRADE approach to rate confidence in the estimates .....                                | 6  |
| Supplementary Figure 1. MEDLINE search strategy (OVID).....                                                    | 7  |
| Supplementary Figure 2. Risk of bias assessment, observational studies .....                                   | 9  |
| Supplementary Figure 3. Radiological findings at baseline and follow-up in Influenza and SARS-CoV studies..... | 10 |
| Supplementary Figure 4. Subgroup analysis by study design - SARS-CoV- 2 .....                                  | 11 |
| Supplementary Figure 5. Subgroup analysis by ventilation - SARS-CoV- 2 .....                                   | 12 |
| Supplementary Figure 6. Subgroup analysis by mechanical ventilation- SARS-CoV- 2 .....                         | 13 |
| Supplementary Figure 7. Subgroup analysis by age- SARS-CoV- 2.....                                             | 14 |
| Supplementary Figure 8. Subgroup analysis by sex- SARS-CoV- 2.....                                             | 15 |
| Supplementary Figure 9. Findings at follow-up, subgroup analysis by study design- all viruses .....            | 16 |
| Supplementary Figure 10. Findings at follow-up, subgroup analysis by ARDS- all viruses.....                    | 17 |
| Supplementary Figure 11. Findings at follow-up, subgroup analysis by mechanical ventilation- all viruses ..... | 18 |

**Supplementary Table 1. Risk of bias assessment, observational studies.** Adapted from the CLARITY Group at McMaster University

| Author(s)                        | Year | 1. Can we be confident in the assessment of exposure? | 2. Can we be confident that the outcome of interest was not present at start of study? | 3. Did the study match the group(s) for all variables that are associated with the outcome of interest or did the statistical analysis adjust for these prognostic variables? | 4. Can we be confident in the assessment of the presence or absence of prognostic factors? | 5. Can we be confident in the assessment of outcome? | 6. Was the follow up of cohorts adequate? | 7. Were co-interventions similar between groups? |
|----------------------------------|------|-------------------------------------------------------|----------------------------------------------------------------------------------------|-------------------------------------------------------------------------------------------------------------------------------------------------------------------------------|--------------------------------------------------------------------------------------------|------------------------------------------------------|-------------------------------------------|--------------------------------------------------|
| Winterbauer, R. H., et al        | 1977 | V. Low                                                | High                                                                                   | V. High                                                                                                                                                                       | V. High                                                                                    | V. Low                                               | Low                                       | N/A                                              |
| Antonio, G. E., et al.           | 2003 | Low                                                   | V. Low                                                                                 | High                                                                                                                                                                          | High                                                                                       | Low                                                  | High                                      | Low                                              |
| Jin, Z. Y., et al.               | 2003 | V. Low                                                | V. Low                                                                                 | N/A                                                                                                                                                                           | Low                                                                                        | Low                                                  | Low                                       | N/A                                              |
| Liu, T., et al.                  | 2003 | V. Low                                                | V. Low                                                                                 | High                                                                                                                                                                          | Low                                                                                        | V. Low                                               | High                                      | N/A                                              |
| Peng, M., et al.                 | 2003 | V. Low                                                | V. Low                                                                                 | Low                                                                                                                                                                           | Low                                                                                        | High                                                 | V. Low                                    | N/A                                              |
| Chiang, C. H., et al.            | 2004 | V. Low                                                | High                                                                                   | N/A                                                                                                                                                                           | Low                                                                                        | Low                                                  | Low                                       | N/A                                              |
| Hsu, H. H., et al.               | 2004 | V. Low                                                | Low                                                                                    | High                                                                                                                                                                          | High                                                                                       | V. Low                                               | High                                      | V. Low                                           |
| Ng, C. K., et al.                | 2004 | V. Low                                                | High                                                                                   | Low                                                                                                                                                                           | High                                                                                       | V. Low                                               | Low                                       | V. Low                                           |
| Wong, K. T., et al.              | 2004 | V. Low                                                | High                                                                                   | V. Low                                                                                                                                                                        | High                                                                                       | V. Low                                               | V. Low                                    | N/A                                              |
| Beijing Respiratory Experts Pane | 2005 | V. Low                                                | V. Low                                                                                 | N/A                                                                                                                                                                           | V. Low                                                                                     | V. Low                                               | Low                                       | N/A                                              |
| Chang, Y. C., et al              | 2005 | V. Low                                                | Low                                                                                    | High                                                                                                                                                                          | Low                                                                                        | Low                                                  | High                                      | V. Low                                           |
| Hui D. S. et al.                 | 2005 | V. Low                                                | Low                                                                                    | Low                                                                                                                                                                           | Low                                                                                        | Low                                                  | High                                      | Low                                              |
| Ong, K. C., et al.               | 2005 | Low                                                   | Low                                                                                    | V. Low                                                                                                                                                                        | V. Low                                                                                     | V. Low                                               | High                                      | N/A                                              |
| Xie, L., et al.                  | 2005 | V. Low                                                | Low                                                                                    | Low                                                                                                                                                                           | High                                                                                       | Low                                                  | Low                                       | Low                                              |
| Zheng, Z. G., et al.             | 2005 | V. Low                                                | V. Low                                                                                 | N/A                                                                                                                                                                           | Low                                                                                        | Low                                                  | V. High                                   | N/A                                              |
| Li, T. S., et al.                | 2006 | V. Low                                                | High                                                                                   | Low                                                                                                                                                                           | High                                                                                       | Low                                                  | Low                                       | N/A                                              |
| Tansey, C. M., et al.            | 2007 | V. Low                                                | V. Low                                                                                 | High                                                                                                                                                                          | Low                                                                                        | V. Low                                               | High                                      | N/A                                              |
| Lu PX, et al.                    | 2010 | V. Low                                                | High                                                                                   | N/A                                                                                                                                                                           | High                                                                                       | V. Low                                               | V. Low                                    | N/A                                              |
| Bai, L., et al.                  | 2011 | Low                                                   | High                                                                                   | Low                                                                                                                                                                           | Low                                                                                        | Low                                                  | V. High                                   | High                                             |
| Toufen, C., Jr., et al.          | 2011 | V. Low                                                | Low                                                                                    | N/A                                                                                                                                                                           | V. High                                                                                    | Low                                                  | V. Low                                    | N/A                                              |
| Zarogoulidis, P., et al.         | 2011 | V. Low                                                | Low                                                                                    | N/A                                                                                                                                                                           | Low                                                                                        | Low                                                  | V. Low                                    | N/A                                              |
| Luyt, C. E. et al.               | 2012 | V. Low                                                | V. Low                                                                                 | High                                                                                                                                                                          | High                                                                                       | Low                                                  | V. Low                                    | V. Low                                           |
| Mineo, G., et al.                | 2012 | V. Low                                                | High                                                                                   | V. High                                                                                                                                                                       | Low                                                                                        | V. Low                                               | Low                                       | N/A                                              |
| Quispe-Laime, A. M., et al.      | 2012 | V. Low                                                | Low                                                                                    | N/A                                                                                                                                                                           | V. High                                                                                    | Low                                                  | V. Low                                    | N/A                                              |
| Singh, V., et al.                | 2012 | V. Low                                                | High                                                                                   | N/A                                                                                                                                                                           | V. High                                                                                    | Low                                                  | N/A                                       | N/A                                              |
| Edgeworth, D., et al.            | 2013 | Low                                                   | High                                                                                   | N/A                                                                                                                                                                           | V. High                                                                                    | V. Low                                               | N/A                                       | N/A                                              |
| Dai, J., et al.                  | 2014 | Low                                                   | V. Low                                                                                 | N/A                                                                                                                                                                           | V. High                                                                                    | V. Low                                               | High                                      | N/A                                              |
| Liu, W., et al.                  | 2015 | High                                                  | Low                                                                                    | N/A                                                                                                                                                                           | V. High                                                                                    | High                                                 | High                                      | N/A                                              |
| Wu X., et al.                    | 2016 | Low                                                   | High                                                                                   | N/A                                                                                                                                                                           | High                                                                                       | V. Low                                               | V. Low                                    | N/A                                              |
| Chen, J., et al.                 | 2017 | High                                                  | High                                                                                   | Low                                                                                                                                                                           | High                                                                                       | Low                                                  | Low                                       | Low                                              |
| Hsieh, M. J., et al.             | 2018 | V. Low                                                | Low                                                                                    | V. High                                                                                                                                                                       | V. High                                                                                    | V. Low                                               | V. Low                                    | N/A                                              |
| Li, H., et al.                   | 2018 | V. Low                                                | V. Low                                                                                 | Low                                                                                                                                                                           | High                                                                                       | V. Low                                               | V. Low                                    | Low                                              |
| Park, W. B., et al.              | 2018 | V. Low                                                | Low                                                                                    | N/A                                                                                                                                                                           | High                                                                                       | V. Low                                               | High                                      | High                                             |
| Saha, A., et al.                 | 2018 | V. Low                                                | High                                                                                   | N/A                                                                                                                                                                           | V. High                                                                                    | Low                                                  | V. Low                                    | Low                                              |
| Arnold, D. T., et al.            | 2020 | V. Low                                                | High                                                                                   | High                                                                                                                                                                          | High                                                                                       | V. Low                                               | Low                                       | High                                             |
| Daher, A., et al.                | 2020 | V. Low                                                | Low                                                                                    | V. High                                                                                                                                                                       | Low                                                                                        | V. Low                                               | V. Low                                    | N/A                                              |
| Huang, Y., et al.                | 2020 | V. Low                                                | Low                                                                                    | High                                                                                                                                                                          | Low                                                                                        | V. Low                                               | V. Low                                    | Low                                              |

|                                         |      |         |         |         |         |        |         |      |
|-----------------------------------------|------|---------|---------|---------|---------|--------|---------|------|
| Li, R., et al.                          | 2020 | V. Low  | High    | V. High | V. High | V. Low | High    | High |
| Liang, L., et al.                       | 2020 | V. Low  | High    | Low     | Low     | V. Low | High    | N/A  |
| Liu C., et al.                          | 2020 | V. Low  | V. High | V. High | High    | V. Low | V. Low  | N/A  |
| Liu D., et al.                          | 2020 | V. Low  | High    | V. High | Low     | V. Low | V. Low  | N/A  |
| Liu X., et al.                          | 2020 | V. Low  | High    | High    | High    | V. Low | High    | High |
| Lv, D., et al.                          | 2020 | V. Low  | V. High | N/A     | V. High | V. Low | V. Low  | N/A  |
| Shah, A. S., et al.                     | 2020 | V. Low  | V. High | High    | High    | V. Low | High    | N/A  |
| Tabatabaei, S. M. H., et al.            | 2020 | Low     | High    | Low     | Low     | V. Low | V. Low  | Low  |
| Wei J., et al.                          | 2020 | Low     | V. High | High    | High    | V. Low | High    | High |
| Yu M., et al.                           | 2020 | V. Low  | V. High | High    | High    | High   | V. Low  | High |
| Zhao, Y. M., et al.                     | 2020 | V. Low  | Low     | Low     | Low     | V. Low | V. Low  | Low  |
| Zhong L., et al.                        | 2020 | Low     | High    | V. High | High    | V. Low | V. High | High |
| Bellan M., et al.                       | 2021 | V. Low  | V. High | Low     | High    | V. Low | V. High | N/A  |
| de Graaf M.A., et al.                   | 2021 | V. Low  | High    | High    | High    | V. Low | Low     | High |
| Guler S.A., et al.                      | 2021 | V. High | Low     | Low     | Low     | V. Low | High    | High |
| Han X., et al.                          | 2021 | V. Low  | High    | Low     | V. High | V. Low | High    | Low  |
| Huang C., et al.                        | 2021 | Low     | High    | Low     | Low     | V. Low | High    | N/A  |
| Myall, K. J., et al.                    | 2021 | Low     | V. High | High    | High    | V. Low | V. High | N/A  |
| Ramani C, et al.                        | 2021 | Low     | V. High | V. High | High    | Low    | High    | N/A  |
| Smet J., et al.                         | 2021 | V. High | V. High | V. High | High    | V. Low | High    | Low  |
| van der Sar - van der Brugge S., et al. | 2021 | V. Low  | V. High | High    | High    | V. Low | Low     | High |
| van Gassel, R. J. J.                    | 2021 | V. Low  | V. High | N/A     | V. High | V. Low | High    | N/A  |

**Answer format:**

Very high. Definitely High risk of bias: There is direct evidence of high risk of bias practices.

High. Probably High risk of bias: There is indirect evidence of high risk of bias practices OR there is insufficient information provided about relevant risk of bias practices.

Low. Probably Low risk of bias: There is indirect evidence of low risk of bias practices OR it is deemed by the risk of bias evaluator that deviations from low risk of bias practices for these criteria during the study would not appreciably bias results, including consideration of direction and magnitude of bias

Very low. Definitely Low risk of bias: There is direct evidence of low risk of bias practices

**Supplementary Table 2. Risk of bias assessment, randomized control trial.** From the CLARITY Group at McMaster University

| Author(s)        | Year | 1. Was the allocation sequence adequately generated? | 2. Was the allocation adequately concealed? | 3. Blinding: Was knowledge of the allocated interventions adequately prevented? | 4. Was loss to follow-up (missing outcome data) infrequent? | 5. Are reports of the study free of selective outcome reporting? | 6. Was the study apparently free of other problems that could put it at a risk of bias? |
|------------------|------|------------------------------------------------------|---------------------------------------------|---------------------------------------------------------------------------------|-------------------------------------------------------------|------------------------------------------------------------------|-----------------------------------------------------------------------------------------|
| Chen, J., et al. | 2006 | V. Low                                               | High                                        | High                                                                            | V. Low                                                      | V. Low                                                           | Low                                                                                     |

**Answer format:**

Very high. Definitely High risk of bias: There is direct evidence of high risk of bias practices.

High. Probably High risk of bias: There is indirect evidence of high risk of bias practices OR there is insufficient information provided about relevant risk of bias practices.

Low. Probably Low risk of bias: There is indirect evidence of low risk of bias practices OR it is deemed by the risk of bias evaluator that deviations from low risk of bias practices for these criteria during the study would not appreciably bias results, including consideration of direction and magnitude of bias

Very low. Definitely Low risk of bias: There is direct evidence of low risk of bias practices

**Supplementary Table 3. GRADE approach to rate confidence in the estimates**

| No of studies                                                  | Design                | Risk of bias | Inconsistency      | Indirectness            | Imprecision          | Publication bias | Certainty (overall score) <sup>1</sup> |
|----------------------------------------------------------------|-----------------------|--------------|--------------------|-------------------------|----------------------|------------------|----------------------------------------|
| <b>a Outcome:</b> Radiological sequelae - Fibrotic             |                       |              |                    |                         |                      |                  |                                        |
| 26                                                             | Observational studies | Moderate     | High inconsistency | No serious indirectness | Moderate imprecision | Moderate         | ⊕○○○ Very low                          |
| <b>b Outcome:</b> Radiological sequelae - Inflammatory         |                       |              |                    |                         |                      |                  |                                        |
| 26                                                             | Observational studies | Moderate     | High inconsistency | No serious indirectness | Moderate imprecision | Moderate         | ⊕○○○ Very low                          |
| <b>c Outcome:</b> Functional sequelae – Restrictive impairment |                       |              |                    |                         |                      |                  |                                        |
| 21                                                             | Observational studies | Moderate     | High inconsistency | No serious indirectness | Moderate imprecision | Moderate         | ⊕○○○ Very low                          |
| <b>d Outcome:</b> Functional sequelae – DLCO reduction         |                       |              |                    |                         |                      |                  |                                        |
| 23                                                             | Observational studies | Moderate     | High inconsistency | No serious indirectness | Moderate imprecision | Moderate         | ⊕○○○ Very low                          |

Grading of Recommendations, Assessment, Development and Evaluations

Risk of bias: All included studies with moderate risk of bias. The presence of the outcomes of interest at the beginning of the studies and possible confounding factors were not extensively assessed.

Inconsistency: High inconsistency with significant heterogeneity (I2 > 80%).

Indirectness: No serious indirectness. All study subjects had confirmed viral pneumonia, although severity and eligibility criteria were inconsistent.

Imprecision: Possible effect of sample size and selection.

Publication bias: Moderate: 28 papers published within 12 months from the outbreak (22 referring to SARS-CoV-2; 6 to SARS-CoV), 13 after 12 months (7 referring to SARS-CoV; 5 to Influenza; 1 to MERS-CoV)

<sup>1</sup> 4 ⊕⊕⊕⊕ **High** = This research provides a very good indication of the likely effect. The likelihood that the effect will be substantially different\*\* is low.  
 3 ⊕⊕⊕○ **Moderate** = This research provides a good indication of the likely effect. The likelihood that the effect will be substantially different\*\* is moderate.  
 2 ⊕⊕○○ **Low** = This research provides some indication of the likely effect. However, the likelihood that it will be substantially different\*\* is high.  
 1 ⊕○○○ **Very low** = This research does not provide a reliable indication of the likely effect. The likelihood that the effect will be substantially different\*\* is very high.  
 \*\* Substantially different = a large enough difference that it might affect a decision

**Supplementary Figure 1. MEDLINE search strategy (OVID).** Last carried out on 1<sup>st</sup> March 2021

1. viral pneumonia.mp. or Pneumonia, Viral/
2. Coronaviridae Infections/ or Coronavirus Infections/ or Infectious bronchitis virus/ or Coronaviridae/ or coronav\*.mp. or Middle East Respiratory Syndrome Coronavirus/ or Coronavirus/
3. Betacoronavirus/ or Betacoronavirus 1/ or betacoronav\*.mp.
4. severe acute respiratory syndrome.mp. or Severe Acute Respiratory Syndrome/
5. SARS Virus/ or sars.mp.
6. sars-cov-2.mp.
7. covid19.mp.
8. covid\*.mp.
9. mers.mp. or Middle East Respiratory Syndrome Coronavirus/
10. Influenza A Virus, H7N9 Subtype/ or h7n9.mp. or Influenza A Virus, H5N1 Subtype/ or Influenza A virus/ or Influenza A Virus, H3N2 Subtype/ or Influenza A Virus, H1N2 Subtype/ or influenza\*.mp. or Influenza A Virus, H1N1 Subtype/ or Influenza, Human/
11. Hospitalization/ or hospital\*.mp.
12. Hypoxia/ or Oxygen Inhalation Therapy/ or oxygen therapy.mp.
13. Respiration, Artificial/ or invasive mechanical ventilation.mp. or Positive-Pressure Respiration/ or Respiratory Insufficiency/
14. Ventilation/ or Intermittent Positive-Pressure Ventilation/ or Noninvasive Ventilation/ or ventilation.mp. or Pulmonary Ventilation/
15. Noninvasive Ventilation/ or niv.mp.
16. Continuous Positive Airway Pressure/ or cpap.mp. or Positive-Pressure Respiration/
17. steroid\*.mp.
18. Steroids/ or steroids\*.mp.
19. Glucocorticoids/ or glucorticoids.mp.
20. antiviral.mp. or Antiviral Agents/
21. spirometry.mp. or Spirometry/
22. forced vital capacity.mp. or Vital Capacity/
23. fvc.mp.
24. forced expiratory volume.mp. or Forced Expiratory Volume/
25. fev1.mp.
26. total lung capacity.mp. or Total Lung Capacity/
27. tlc.mp.
28. dlco.mp. or Pulmonary Diffusing Capacity/
29. tlco.mp.
30. pulmonary function test.mp. or Respiratory Function Tests/

31. lung function\*.mp.
32. Tomography, X-Ray Computed/ or ct.mp.
33. computed tomography.mp.
34. computer assisted tomography.mp.
35. fibrosis.mp. or Fibrosis/ or Pulmonary Fibrosis/
36. Bronchiolitis Obliterans/ or lung fibro\*.mp.
37. hrct.mp.
38. high resolution computer tomography.mp. or Lung Diseases, Interstitial/
39. reticulation.mp.
40. fibrosing alveolitis.mp. or Pulmonary Fibrosis/
41. traction bronchiectasis.mp.
42. ground glass\*.mp.
43. ggo.mp.
44. honeycombing.mp.
45. septal thickening.mp.
46. lung distortion.mp.
47. fibrotic disease.mp.
48. restrictive impairment.mp.
49. restrictive test.mp.
50. Cryptogenic Organizing Pneumonia/ or cryptogenic organising pneumonia.mp.
51. bronchiolitis obliterans organizing pneumonia.mp. or Cryptogenic Organizing Pneumonia/
52. 1 or 2 or 3 or 4 or 5 or 6 or 7 or 8 or 9 or 10
53. 11 or 12 or 13 or 14 or 15 or 16 or 17 or 18 or 19 or 20
54. 21 or 22 or 23 or 24 or 25 or 26 or 27 or 28 or 29 or 30 or 31 or 32 or 33 or 34 or 35 or 36 or 37 or 38 or 39 or 40 or 41 or 42 or 43 or 44 or 45 or 46 or 47 or 48 or 49 or 50 or 51
55. 52 and 53 and 54
56. limit 55 to (humans and "all adult (19 plus years)")



**Supplementary Figure 2. Risk of bias assessment, observational studies**

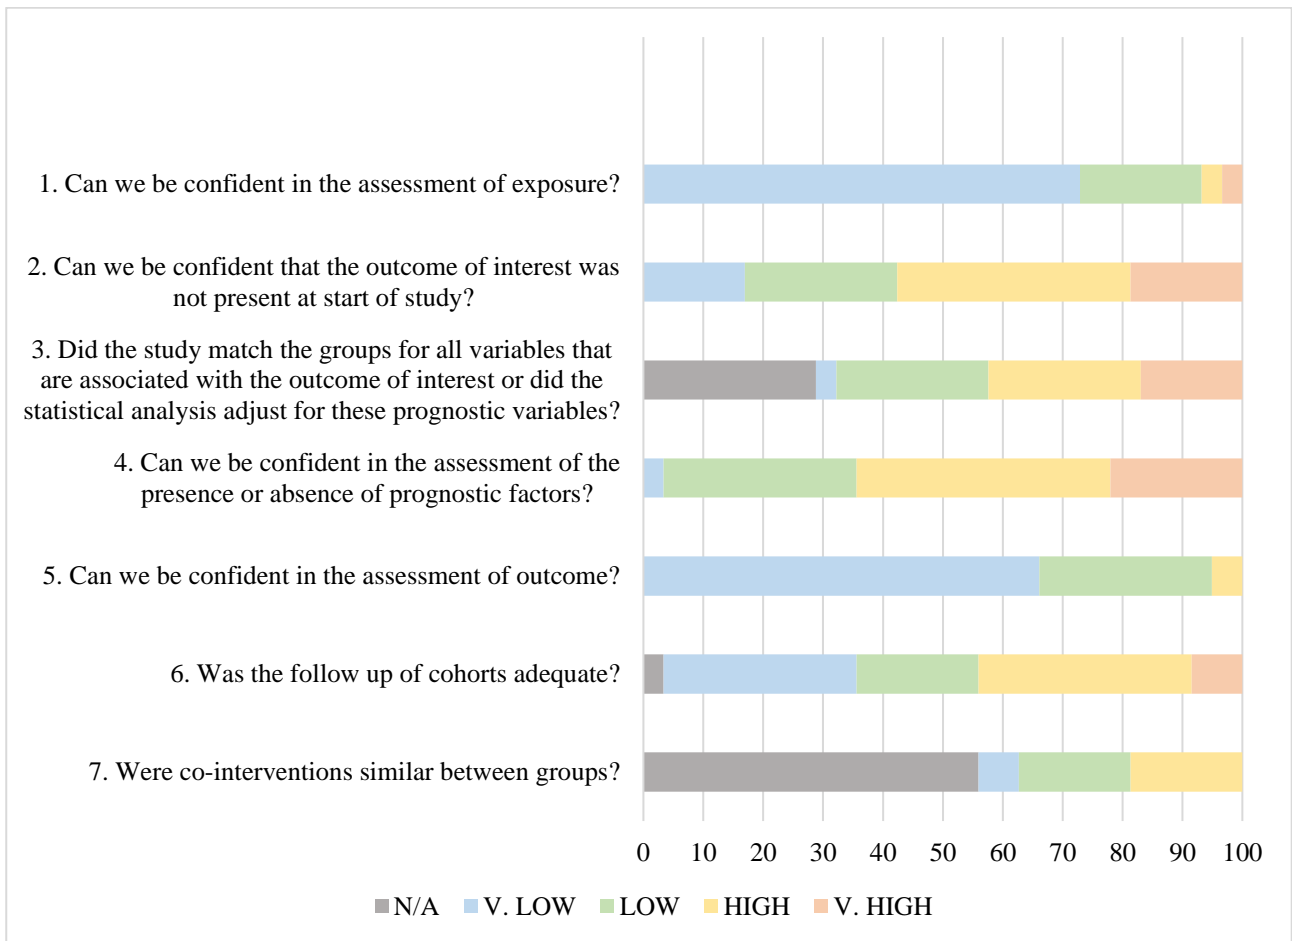

### Supplementary Figure 3. Radiological findings at baseline and follow-up in Influenza and SARS-CoV studies

Estimates are reported as proportion of number of CT scans showing the outcome of interest (n) on the total number of exams performed (N) and 95% confidence interval.

Follow-up visits performed within the first four weeks after discharge were categorised as 1 month, subsequent timepoints within three months were categorised as 3 month, similarly for 6 and 12 months.

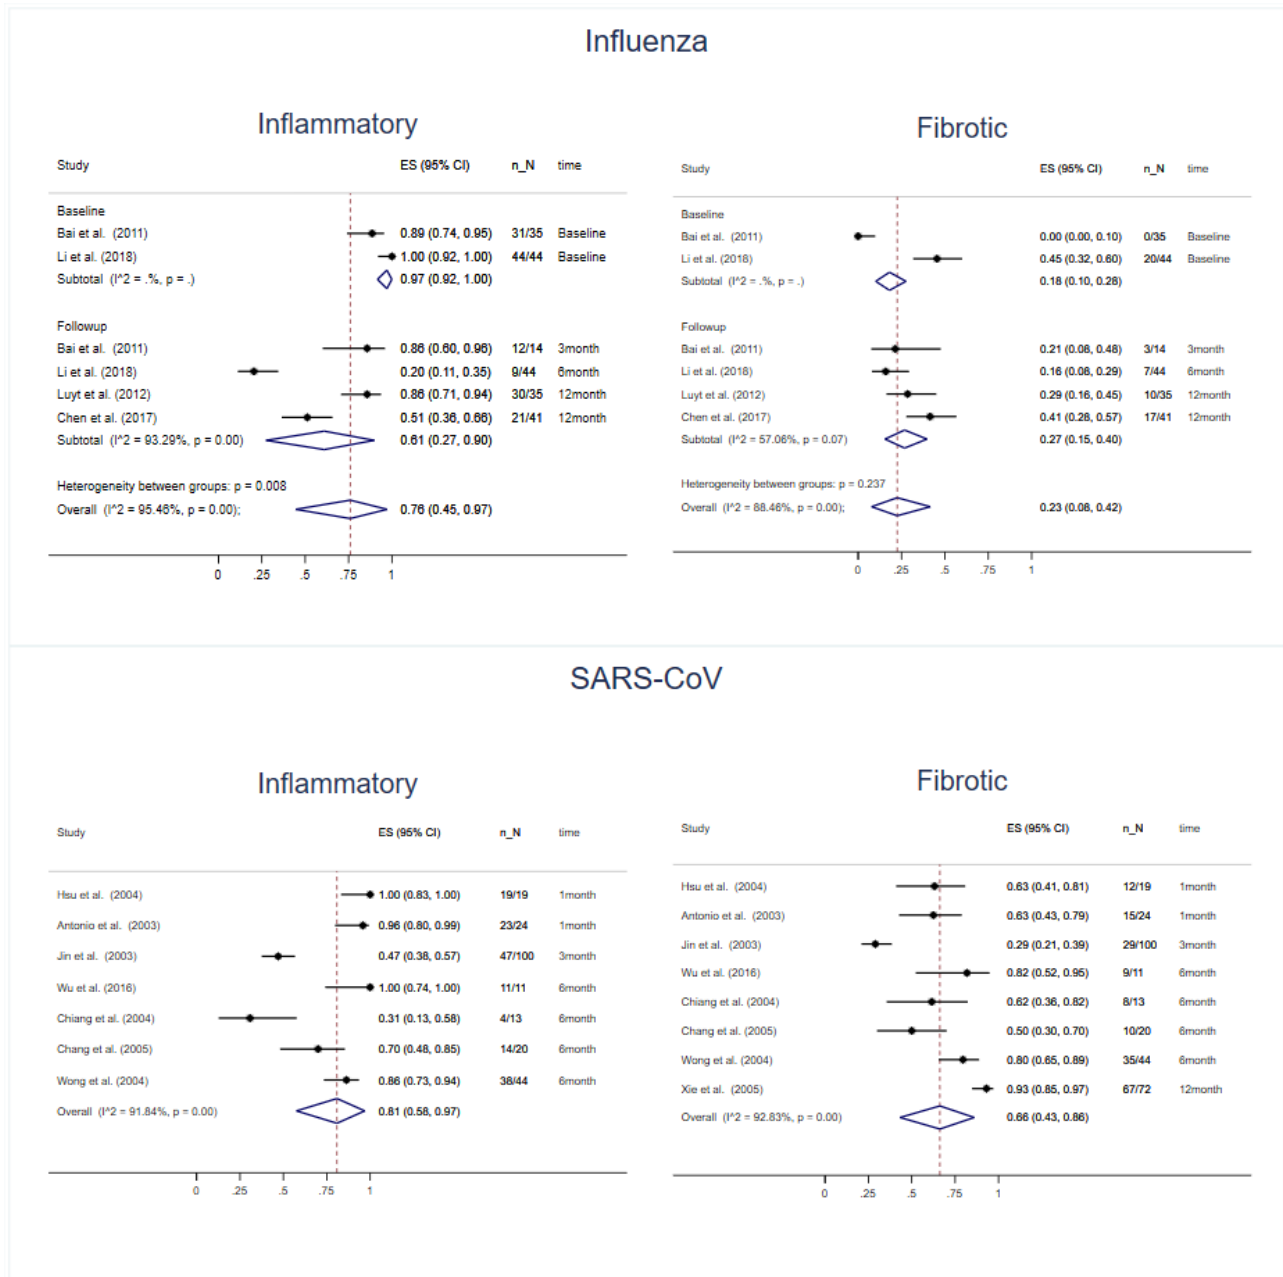

### Supplementary Figure 4. Subgroup analysis by study design - SARS-CoV- 2

Estimates are reported as proportion of number of CT scans showing the outcome of interest (n) on the total number of exams performed (N) and 95% confidence interval.

Follow up visits performed within the first four weeks after discharge were categorised as 1 month, subsequent timepoints within three months were categorised as 3 month, similarly for 6 and 12 months.

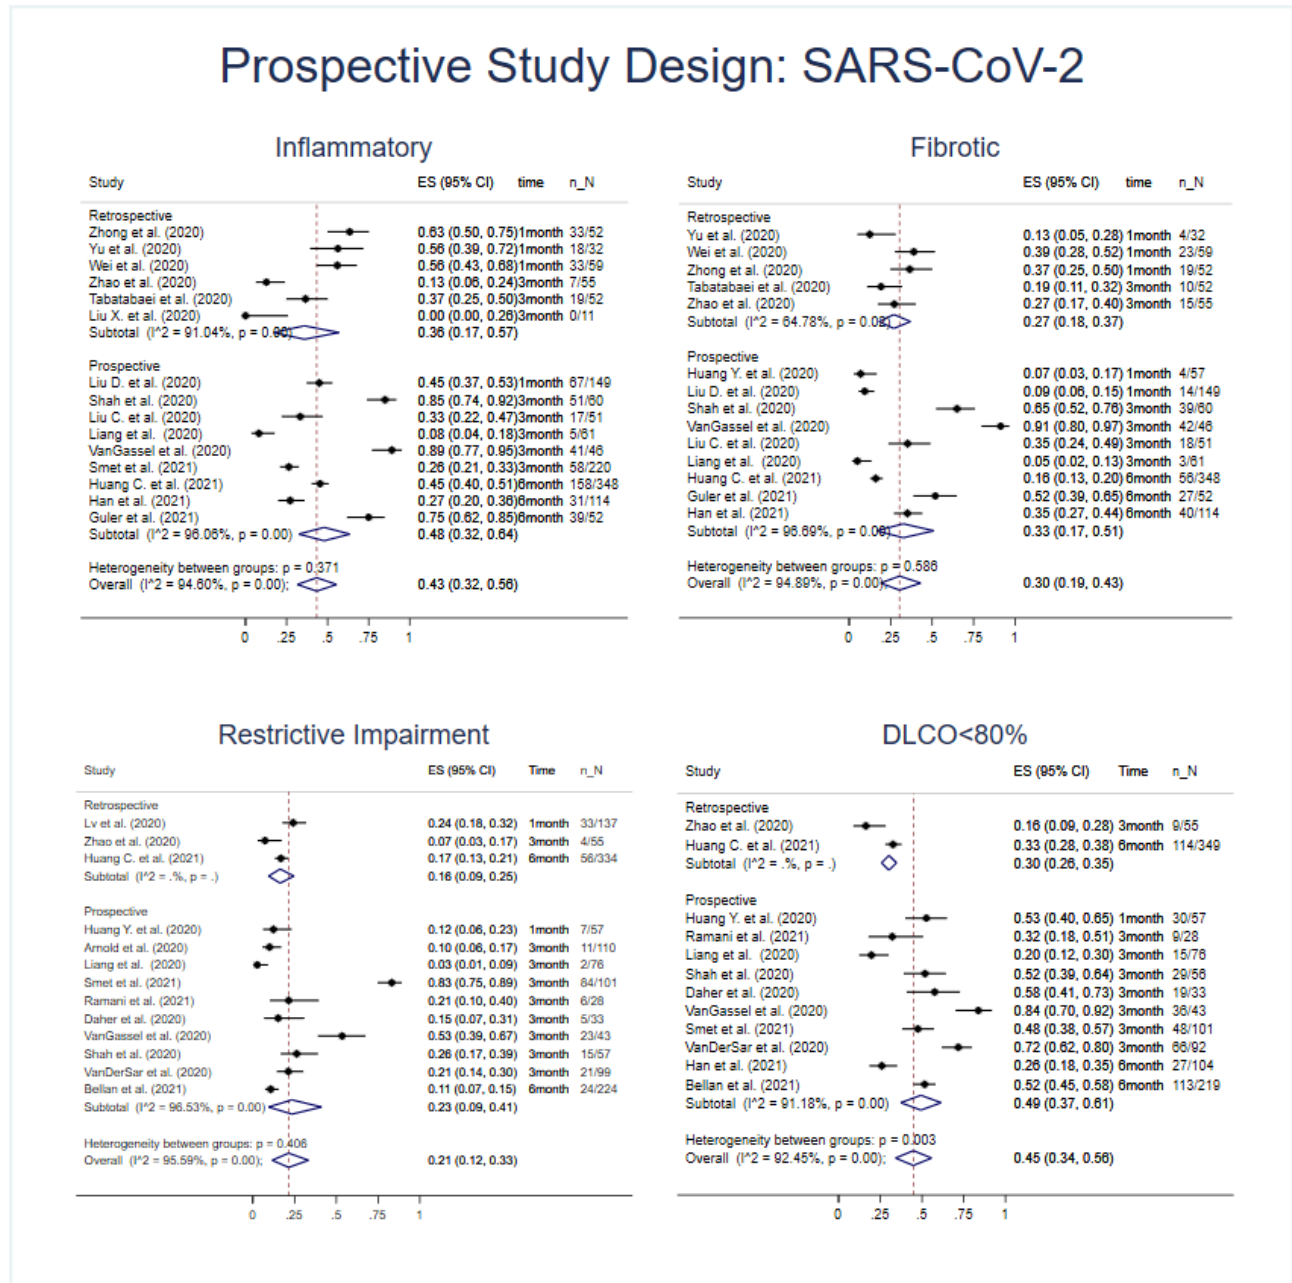

## Supplementary Figure 5. Subgroup analysis by ventilation - SARS-CoV- 2

Estimates are reported as proportion of number of CT scans showing the outcome of interest (n) on the total number of exams performed (N) and 95% confidence interval.

Follow up visits performed within the first four weeks after discharge were categorised as 1 month, subsequent timepoints within three months were categorised as 3 month, similarly for 6 and 12 months

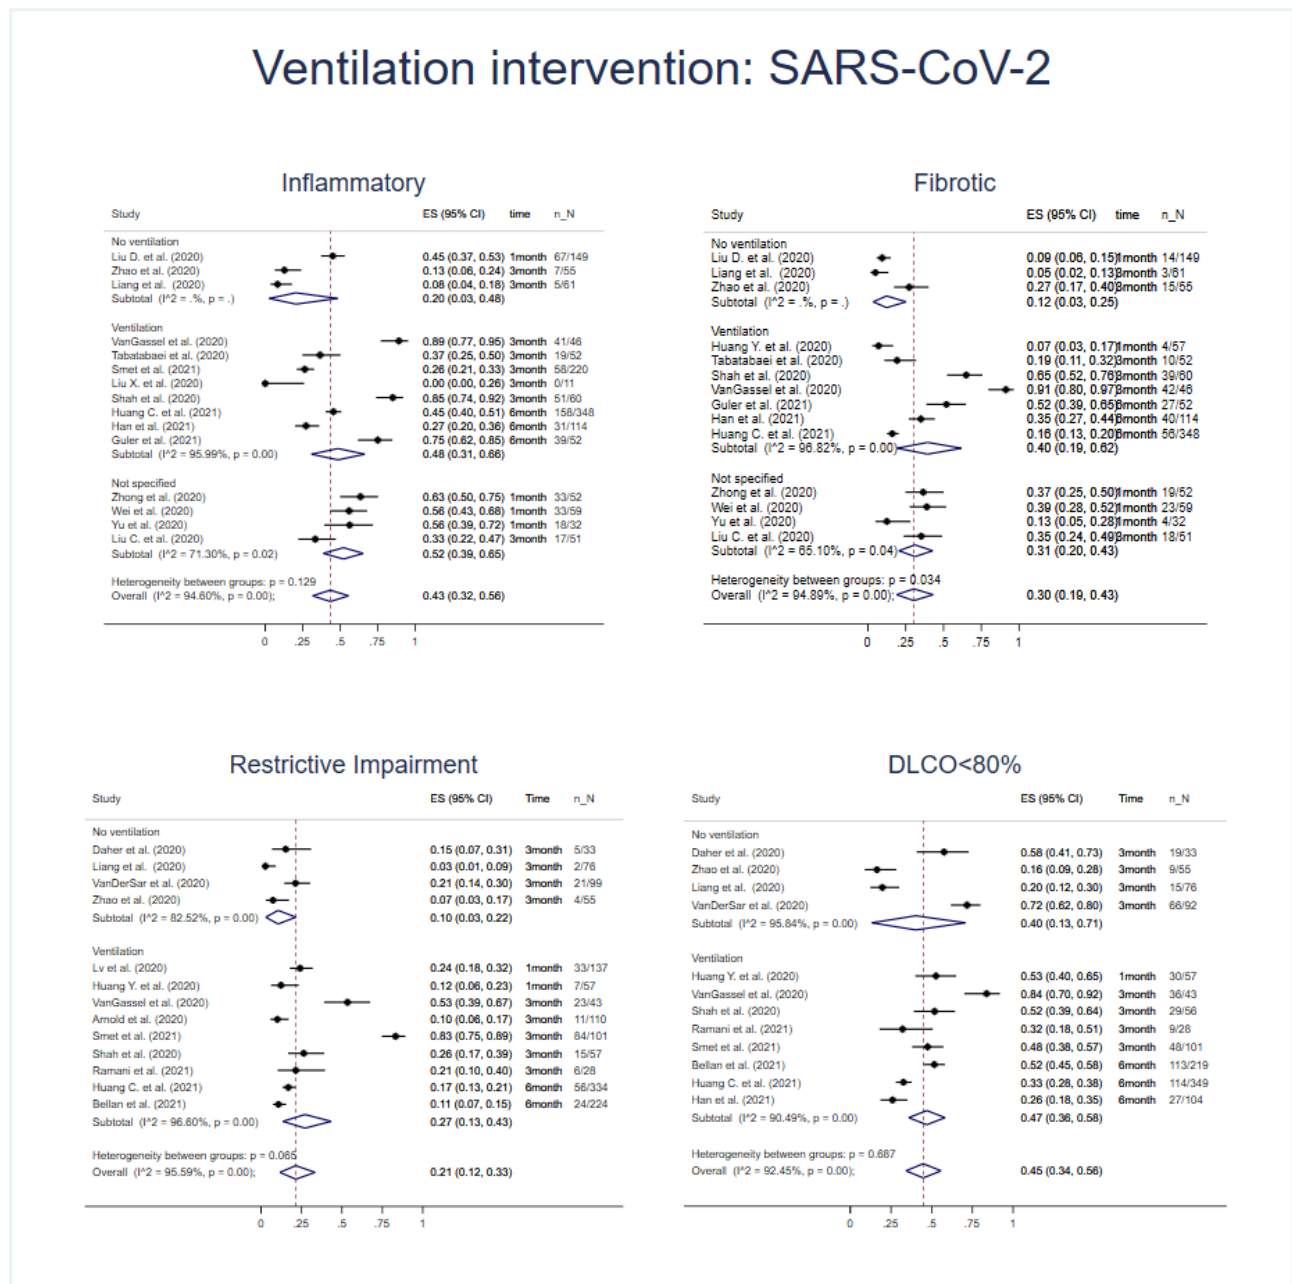

## Supplementary Figure 6. Subgroup analysis by mechanical ventilation- SARS-CoV- 2

Estimates are reported as proportion of number of CT scans showing the outcome of interest (n) on the total number of exams performed (N) and 95% confidence interval.

Follow up visits performed within the first four weeks after discharge were categorised as 1 month, subsequent timepoints within three months were categorised as 3 month, similarly for 6 and 12 months

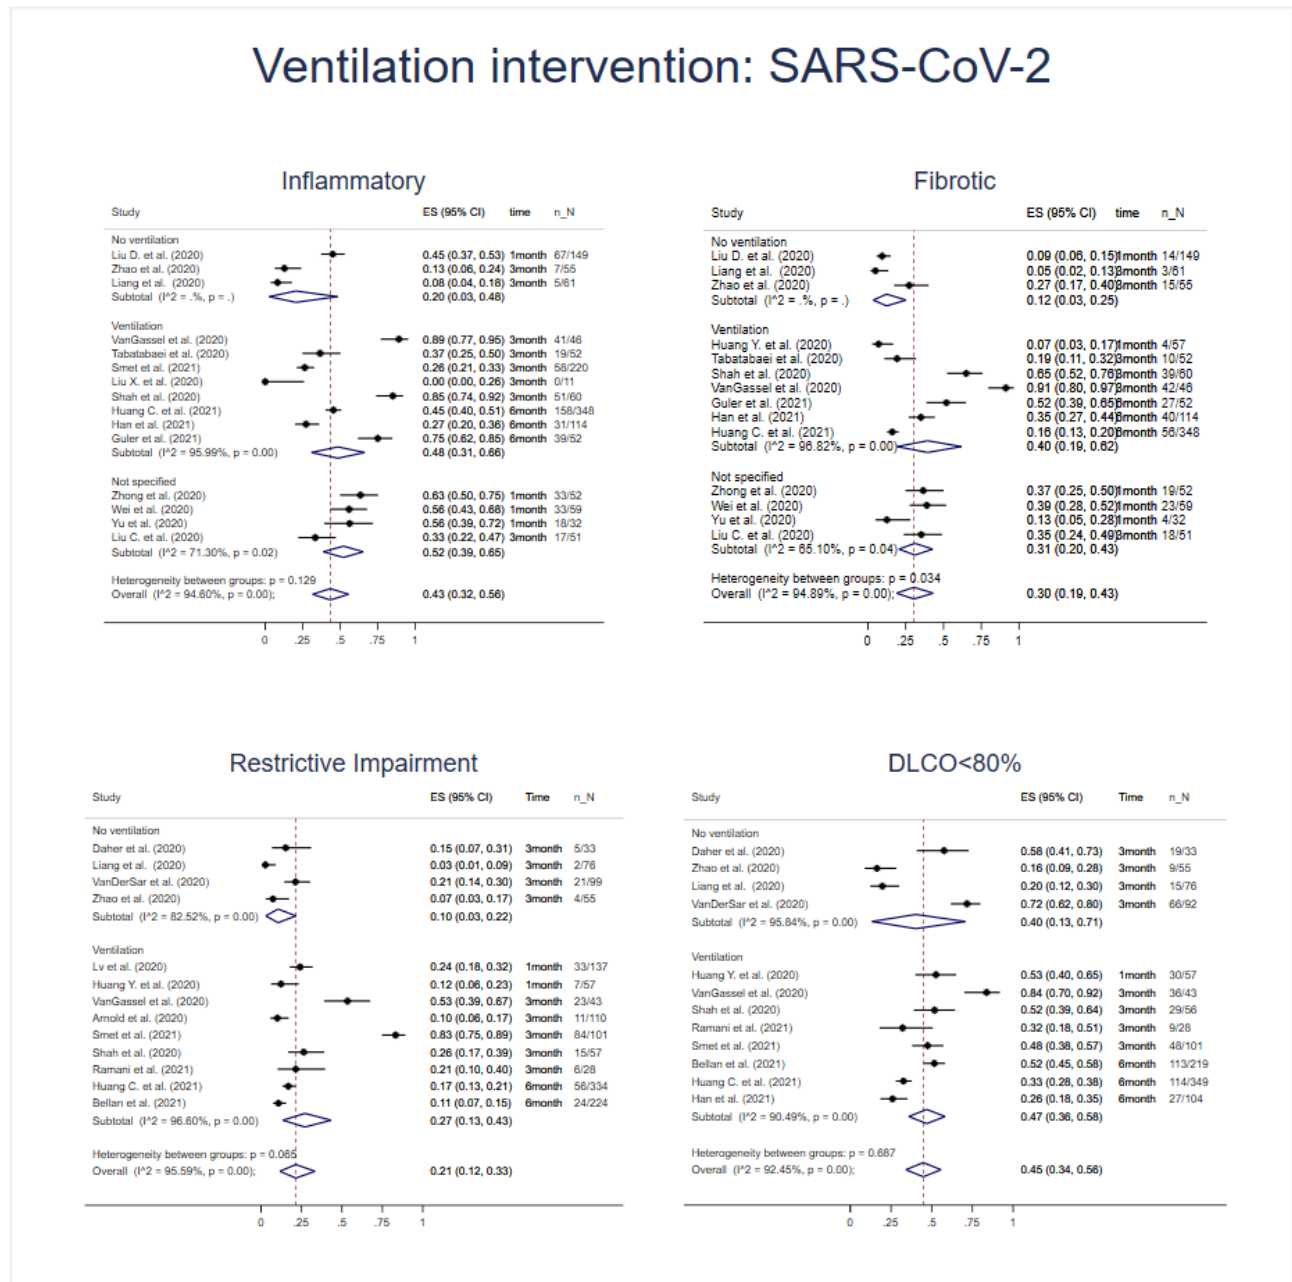

### Supplementary Figure 7. Subgroup analysis by age- SARS-CoV- 2

Estimates are reported as proportion of number of CT scans showing the outcome of interest (n) on the total number of exams performed (N) and 95% confidence interval.

Follow up visits performed within the first four weeks after discharge were categorised as 1 month, subsequent timepoints within three months were categorised as 3 month, similarly for 6 and 12 months. Studies reporting median or mean age  $\geq 50$  were classified as 1.

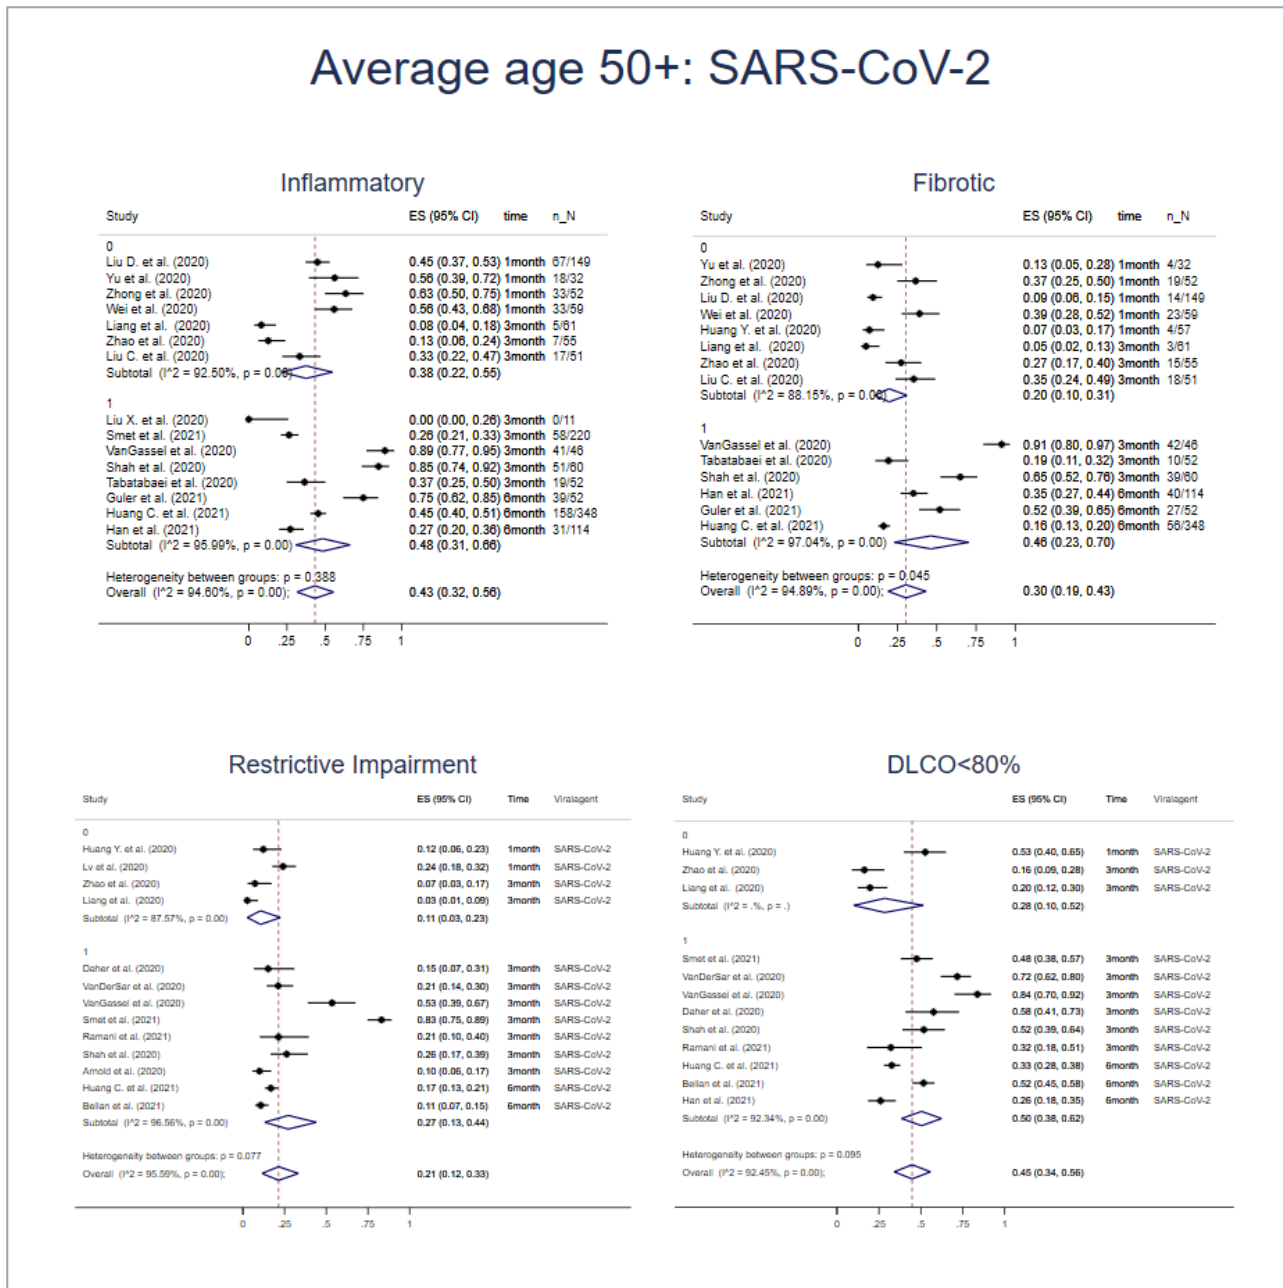

### Supplementary Figure 8. Subgroup analysis by sex- SARS-CoV- 2

Estimates are reported as proportion of number of CT scans showing the outcome of interest (n) on the total number of exams performed (N) and 95% confidence interval.

Follow up visits performed within the first four weeks after discharge were categorised as 1 month, subsequent timepoints within three months were categorised as 3 month, similarly for 6 and 12 months. Studies reporting  $\geq 50\%$  of cohort as male were classified as 1.

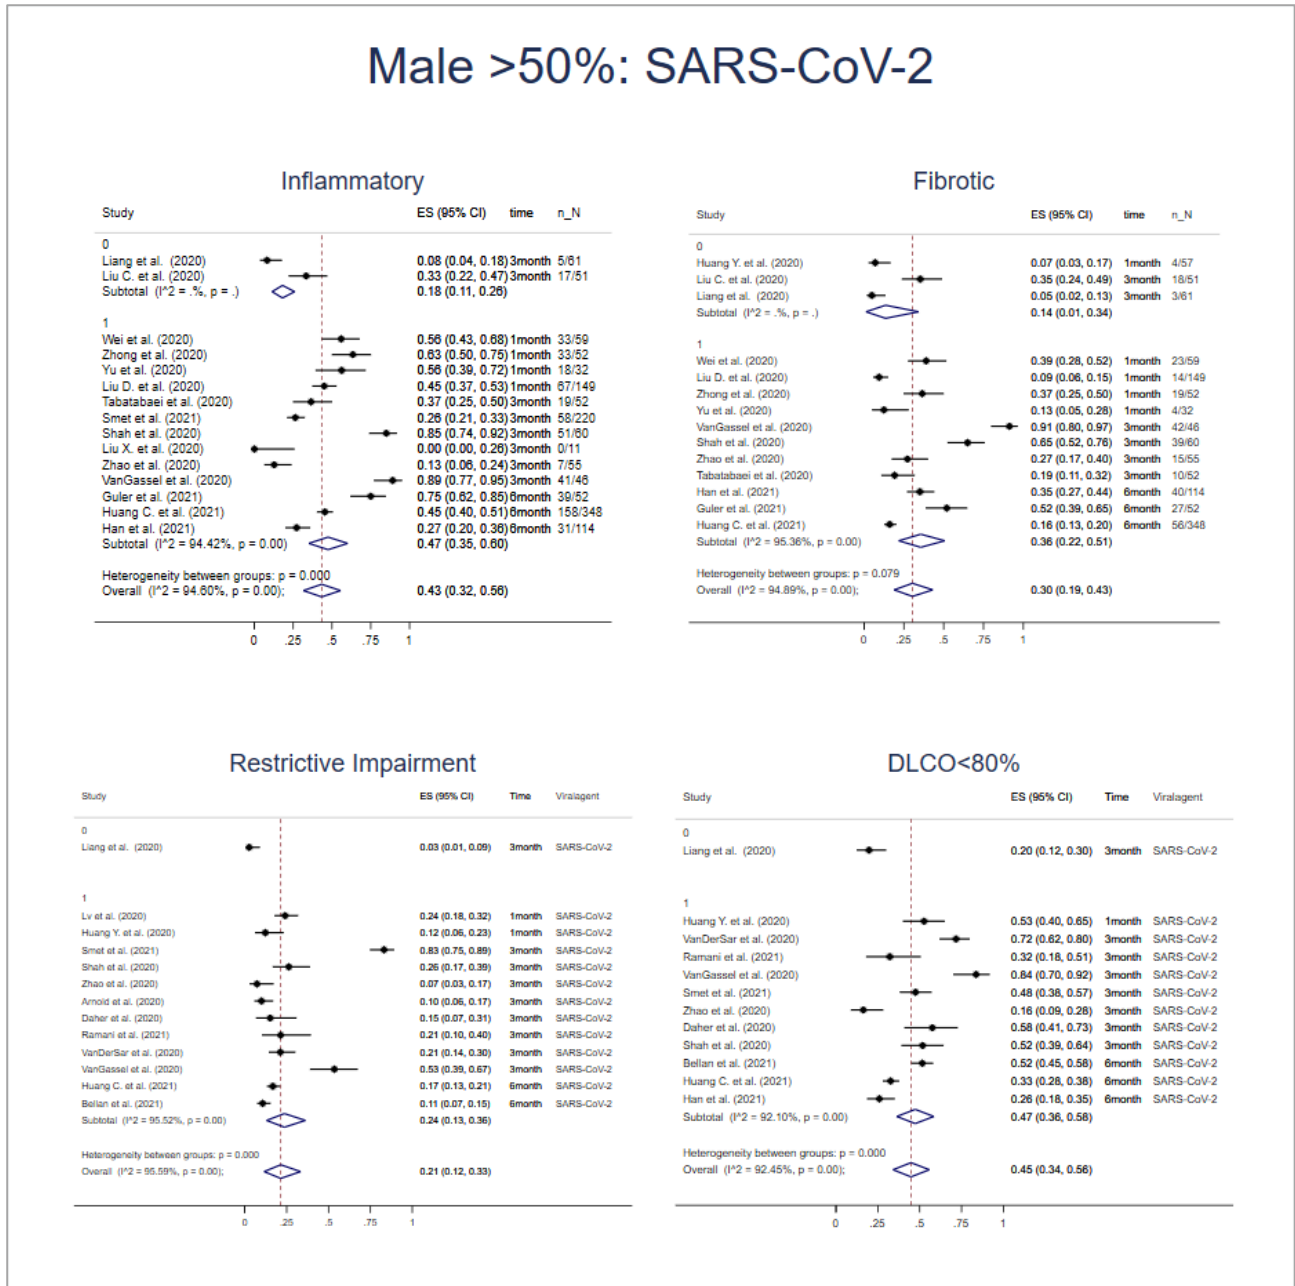

## Supplementary Figure 9. Findings at follow-up, subgroup analysis by study design- all viruses

Estimates are reported as proportion of number of CT scans showing the outcome of interest (n) on the total number of exams performed (N) and 95% confidence interval.

Follow up visits performed within the first four weeks after discharge were categorised as 1 month, subsequent timepoints within three months were categorised as 3 month, similarly for 6 and 12 months

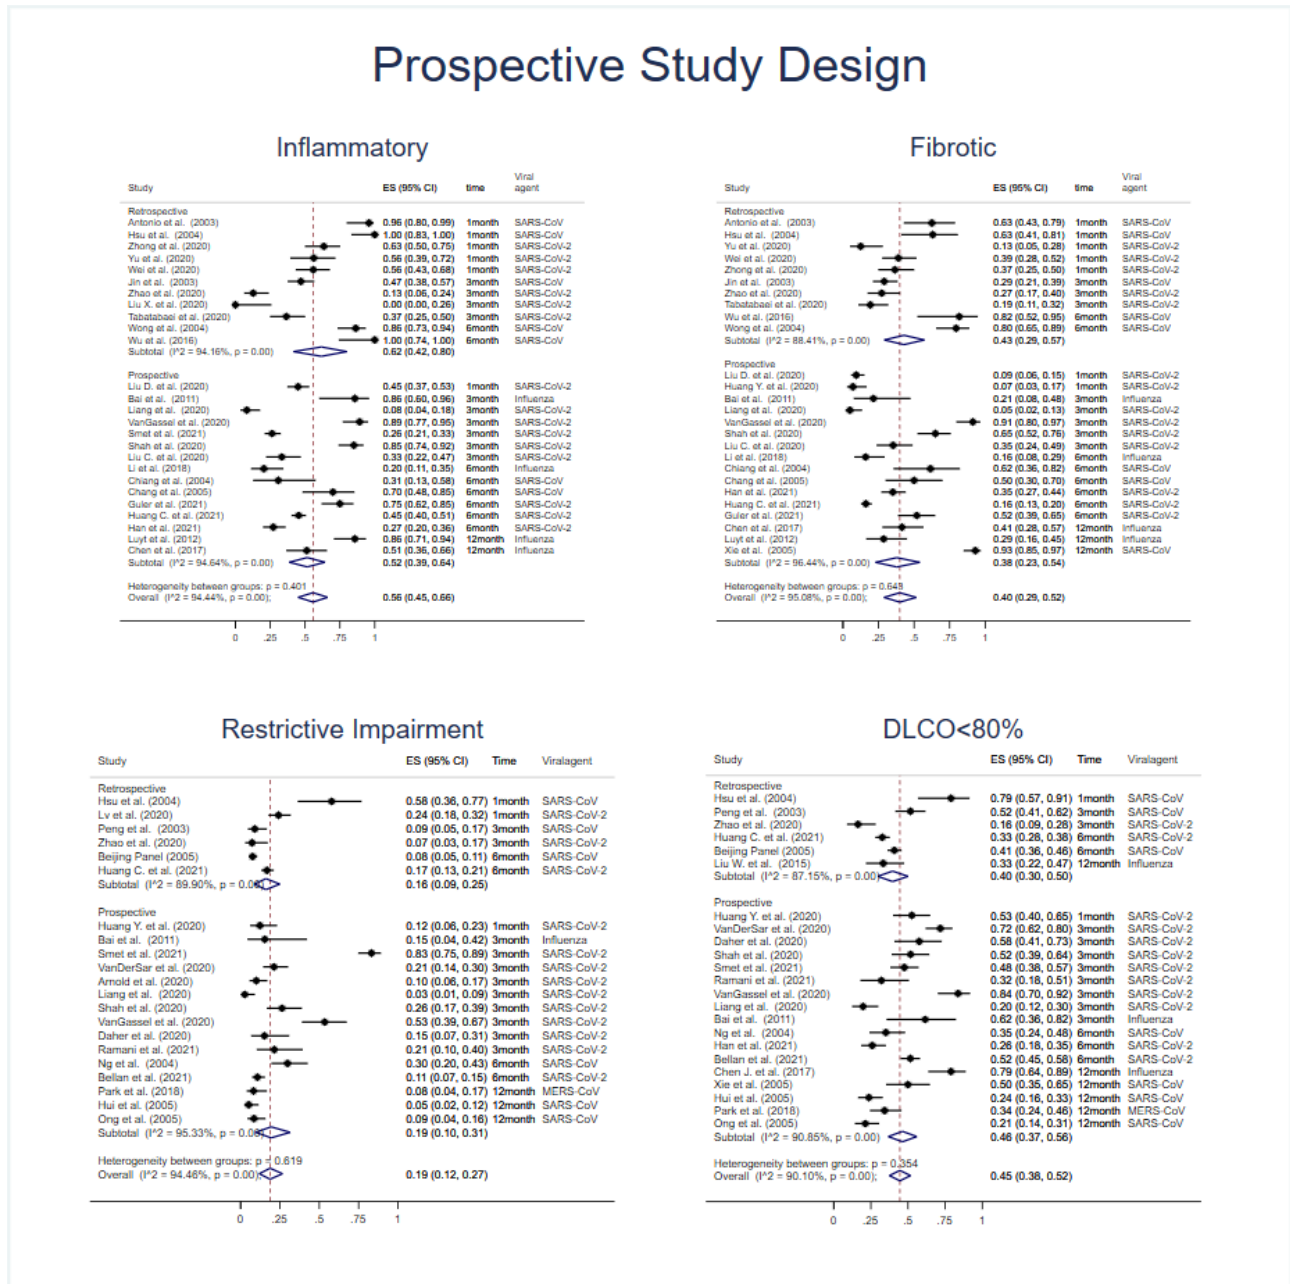



## Supplementary Figure 10. Findings at follow-up, subgroup analysis by ARDS- all viruses

Estimates are reported as proportion of number of CT scans showing the outcome of interest (n) on the total number of exams performed (N) and 95% confidence interval.

Follow up visits performed within the first four weeks after discharge were categorised as 1 month, subsequent timepoints within three months were categorised as 3 month, similarly for 6 and 12 months

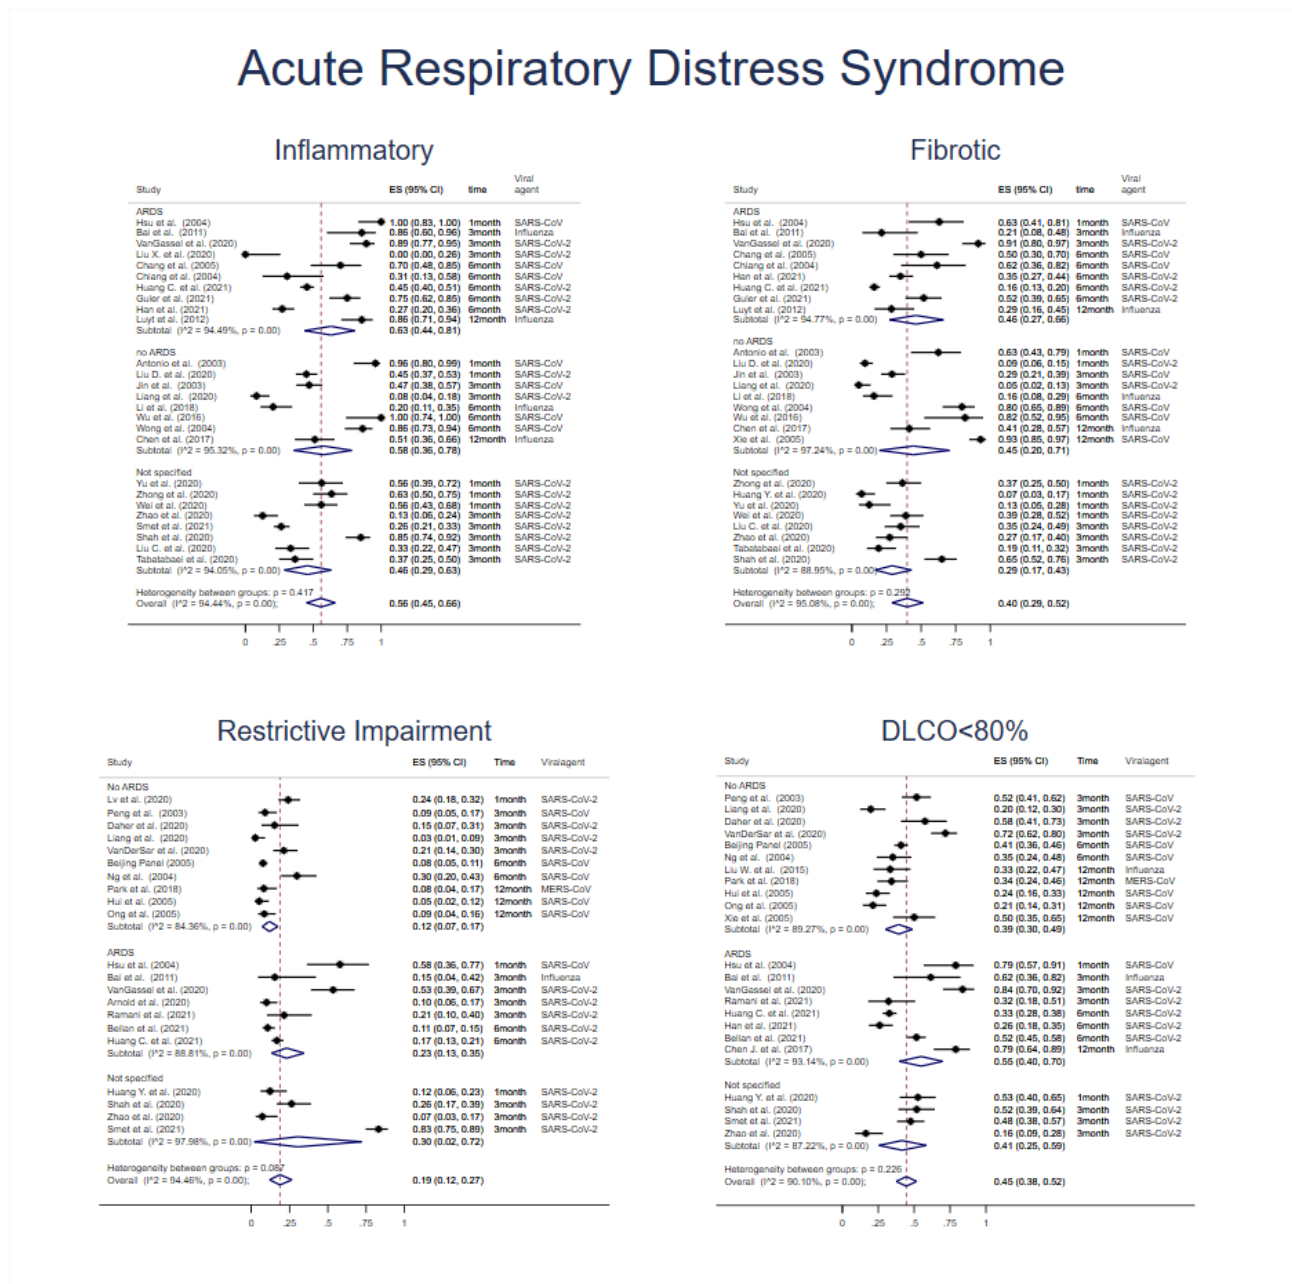

### Supplementary Figure 11. Findings at follow-up, subgroup analysis by mechanical ventilation- all viruses

Estimates are reported as proportion of number of CT scans showing the outcome of interest (n) on the total number of exams performed (N) and 95% confidence interval.

Follow up visits performed within the first four weeks after discharge were categorised as 1 month, subsequent timepoints within three months were categorised as 3 month, similarly for 6 and 12 months

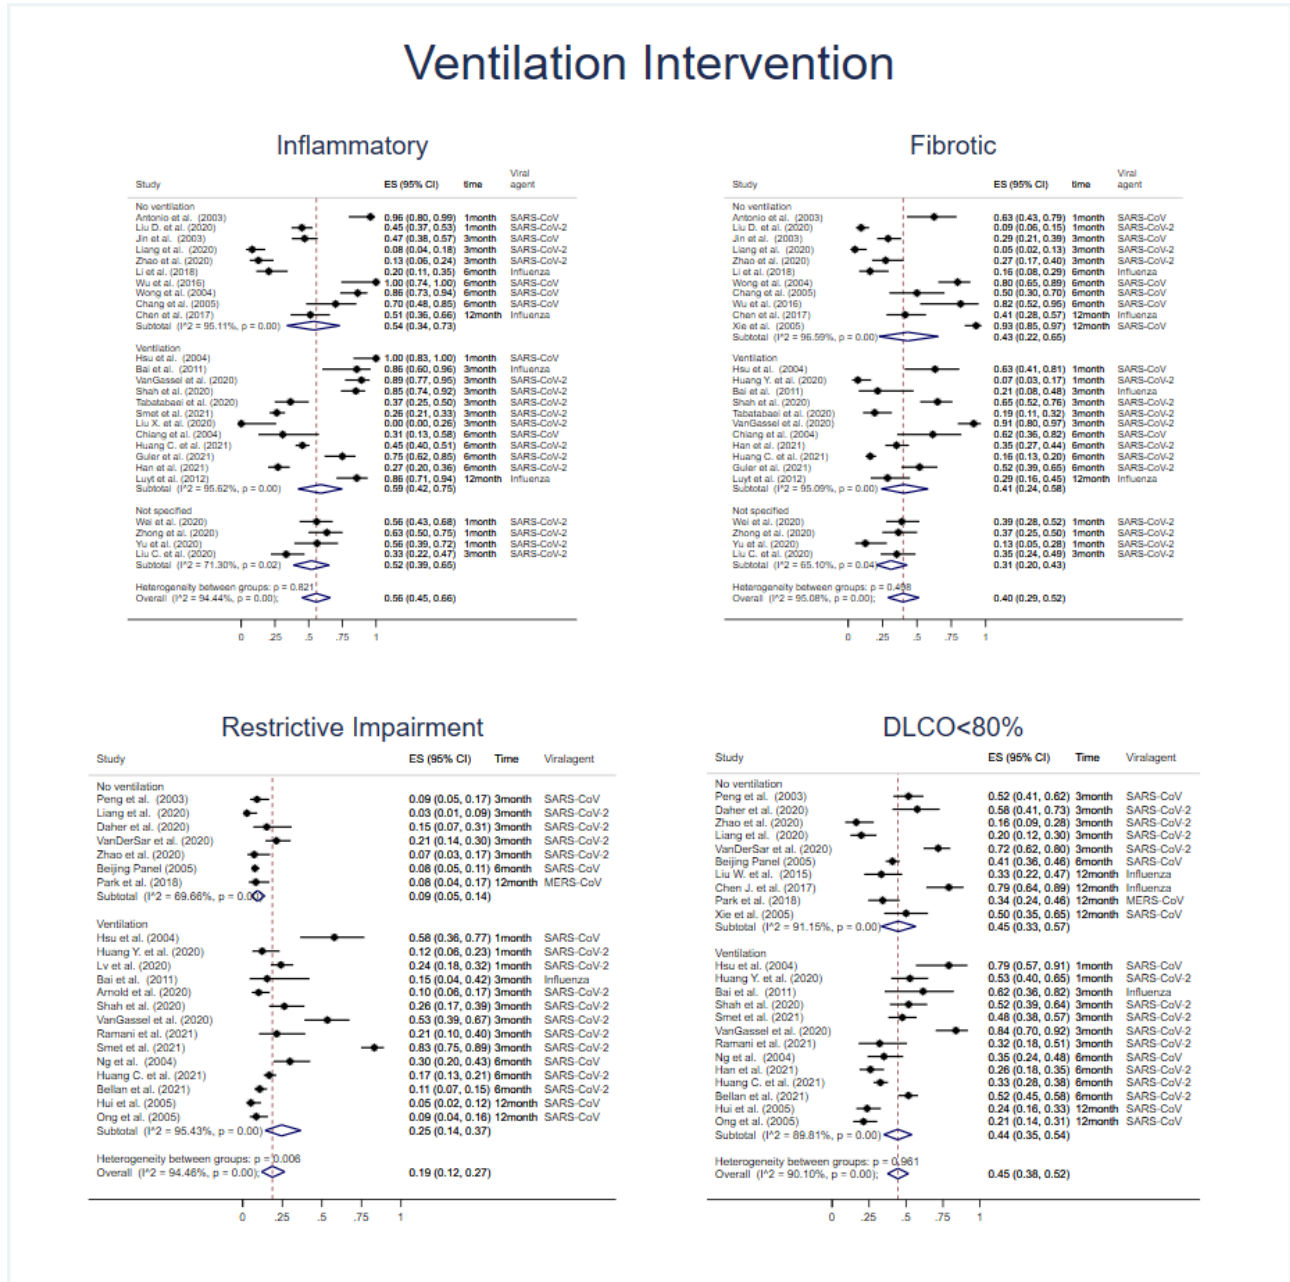

Supplement: Supplementary file [file media-1.pdf]
